# Supplementary material
Source: publisher figshare collection journal article supplement (https://tandf.figshare.com/articles/dataset/_/7880678)

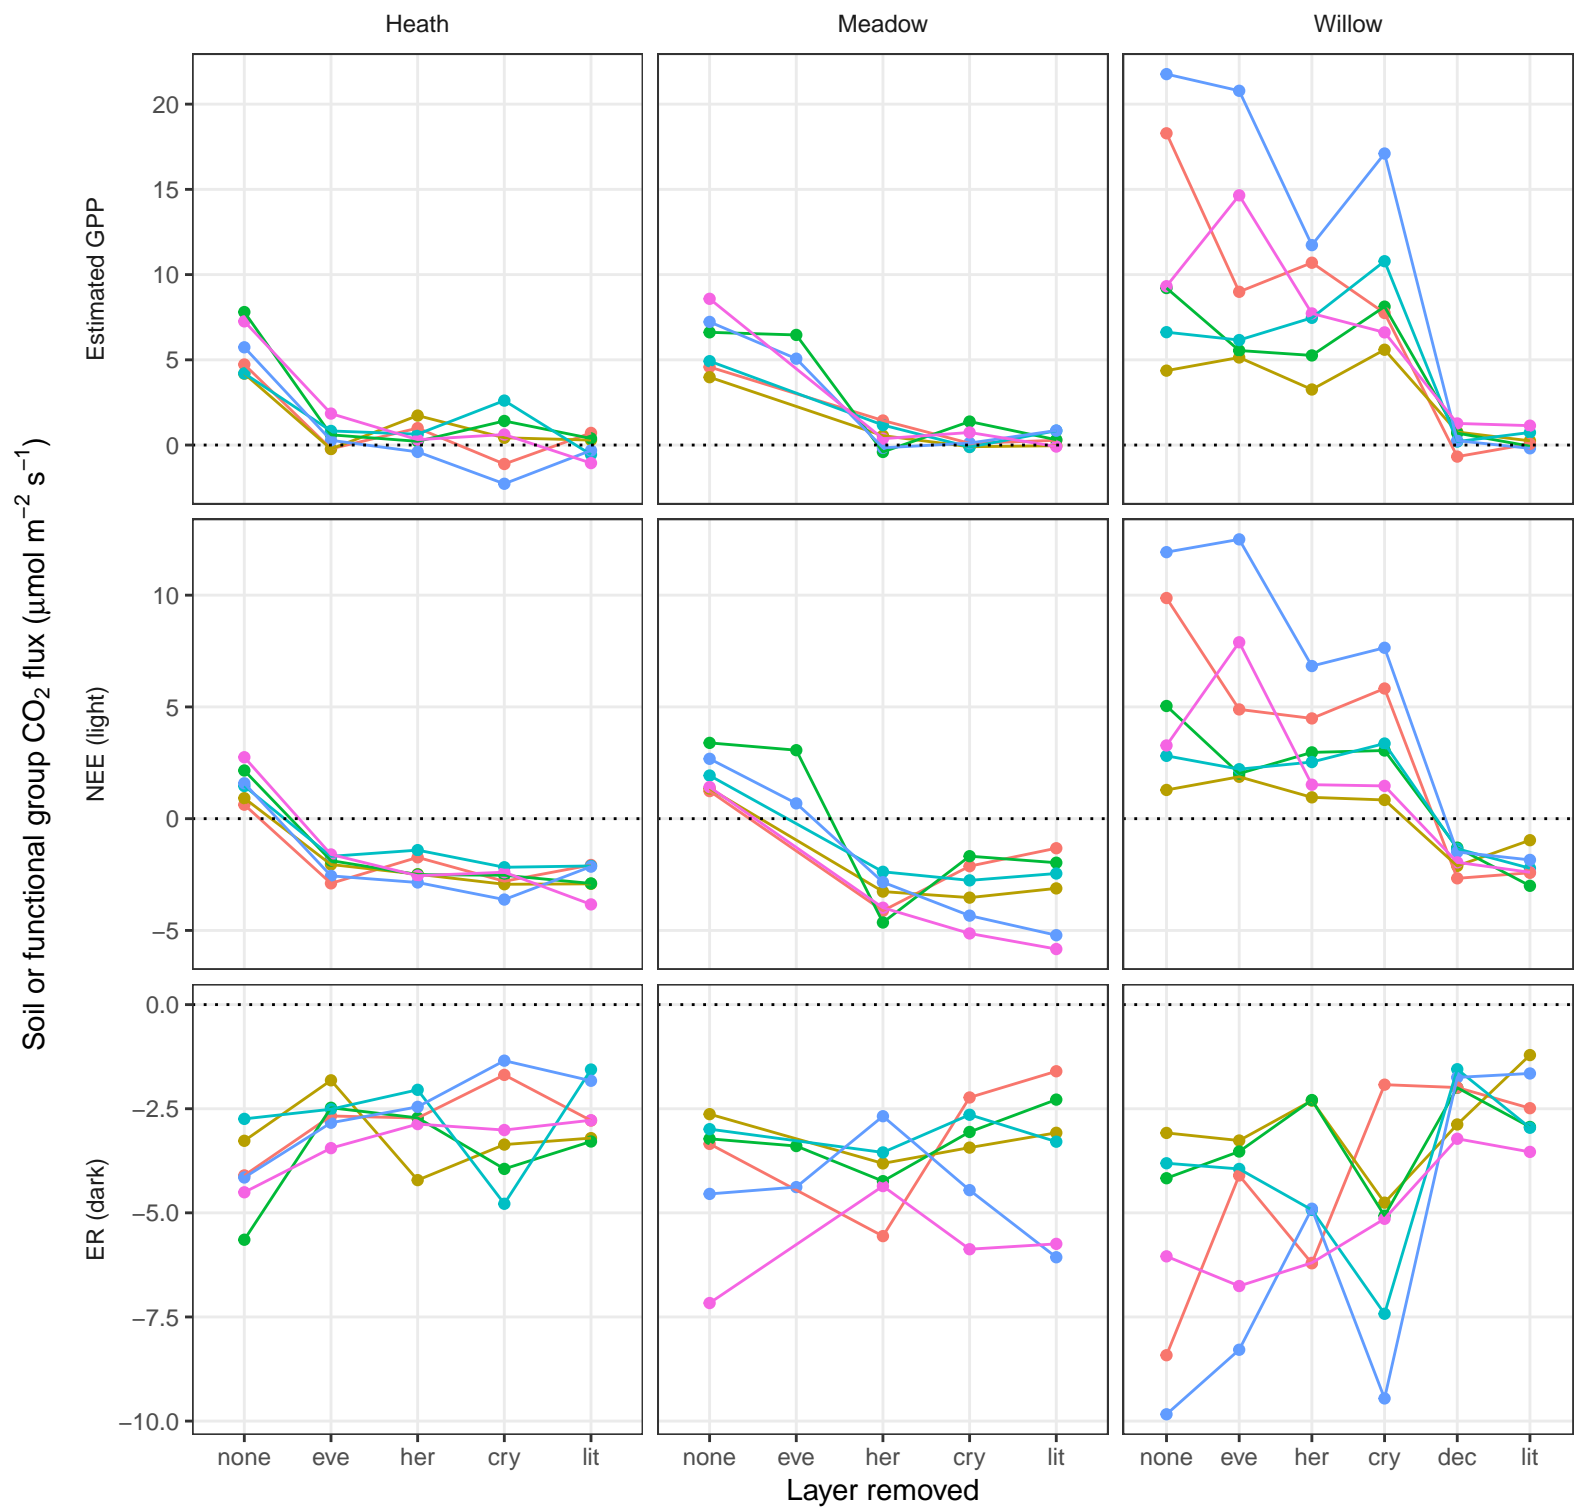

Supplement: Supplementary file 1 [file 1]

Figure S2

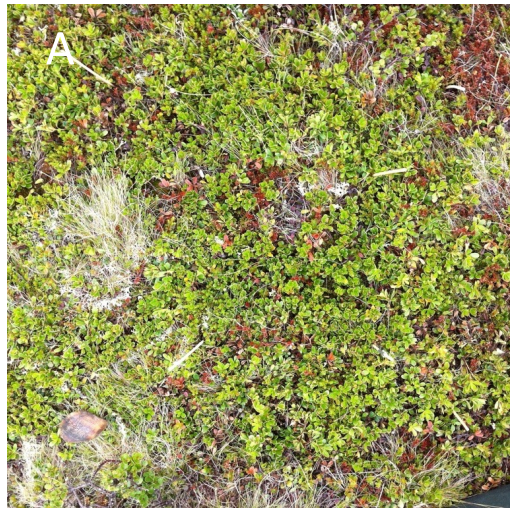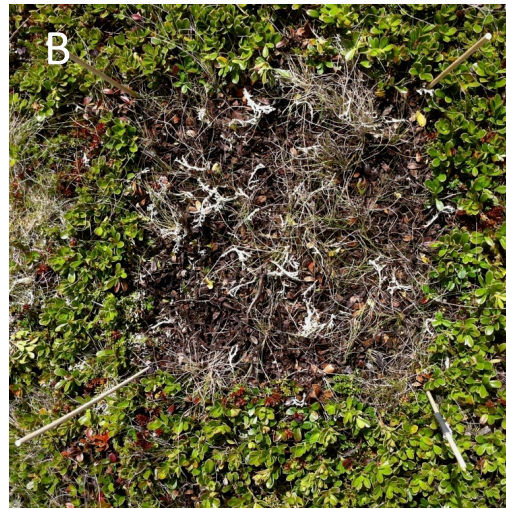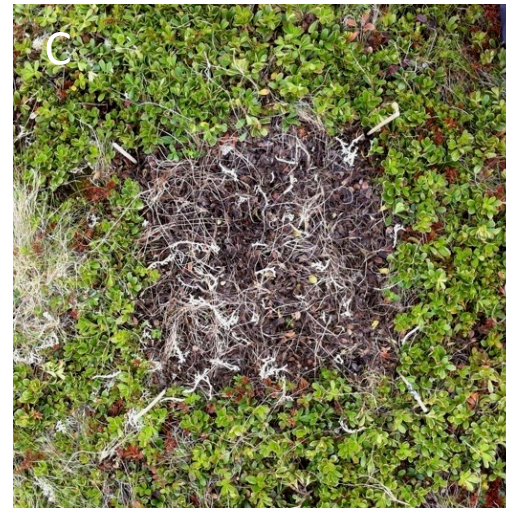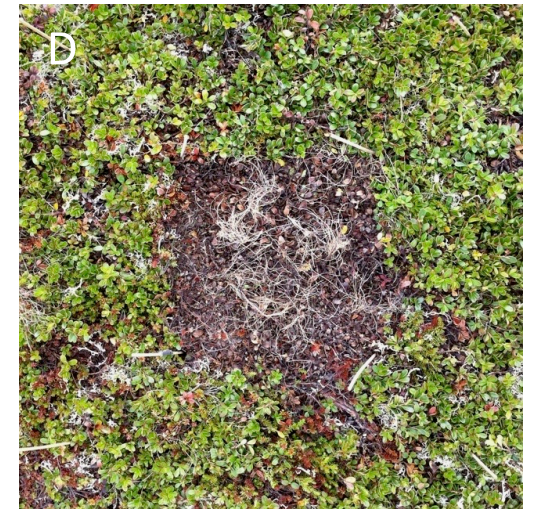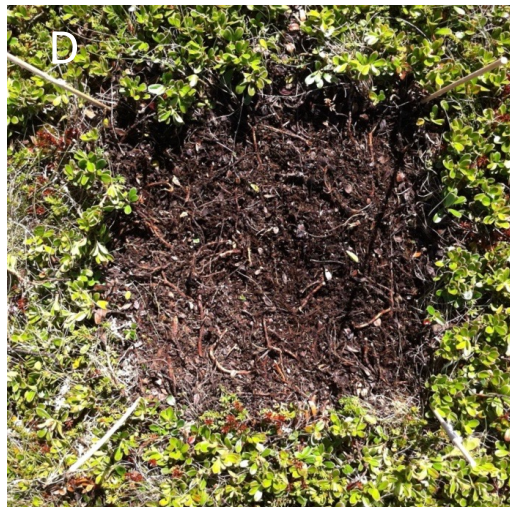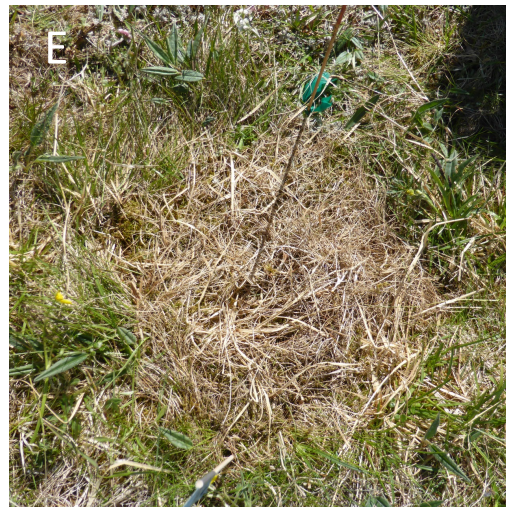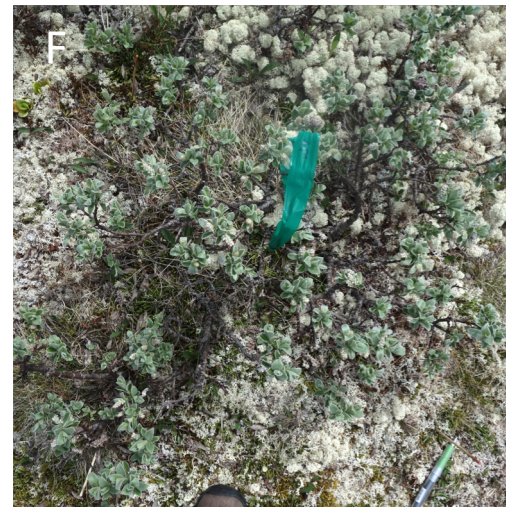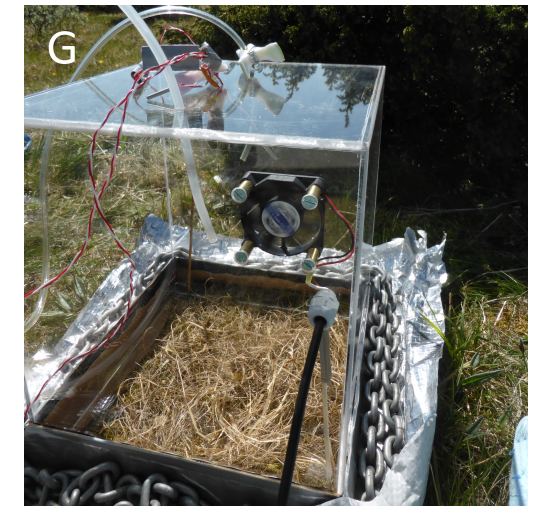

Supplement: Supplementary file 2 [file 1]

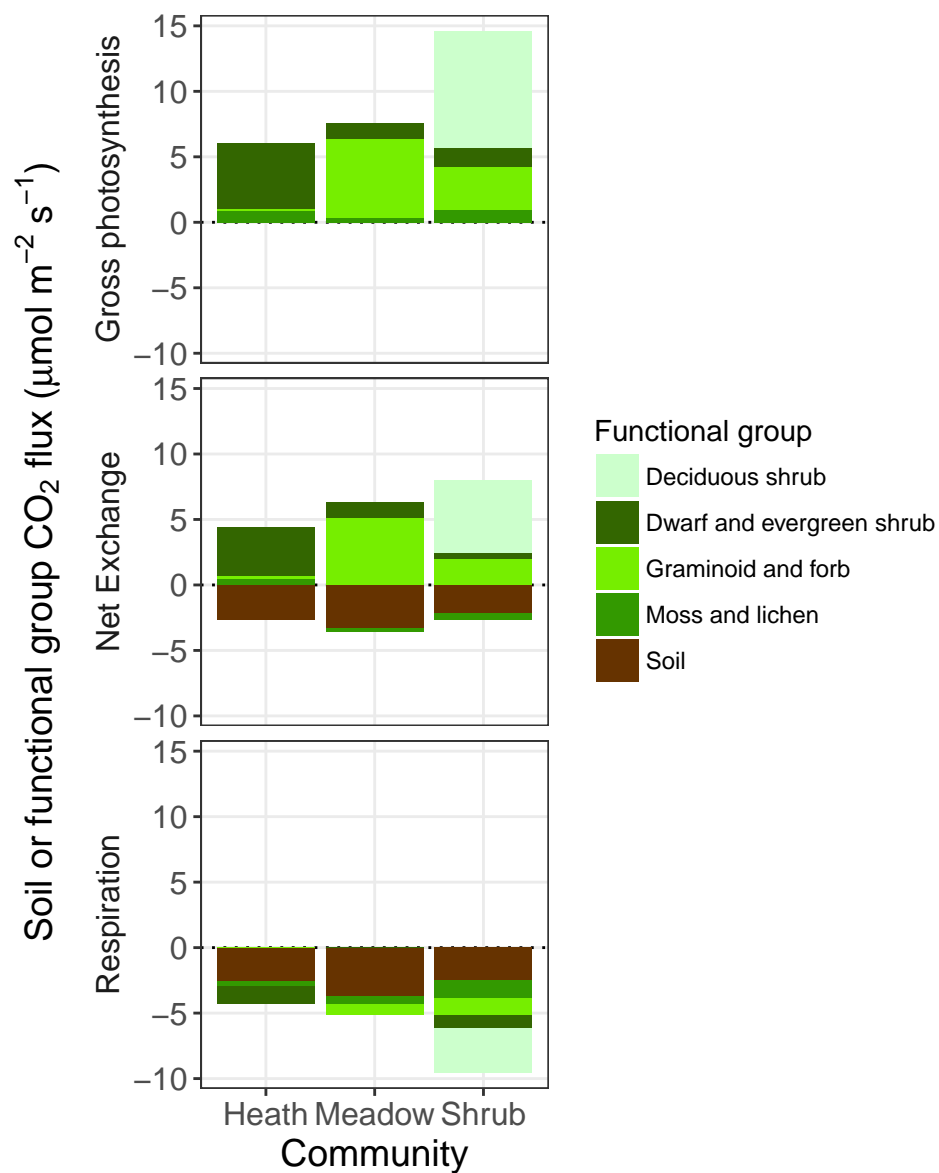

Supplement: Supplementary file 3 [file 1]

Figure S1

A

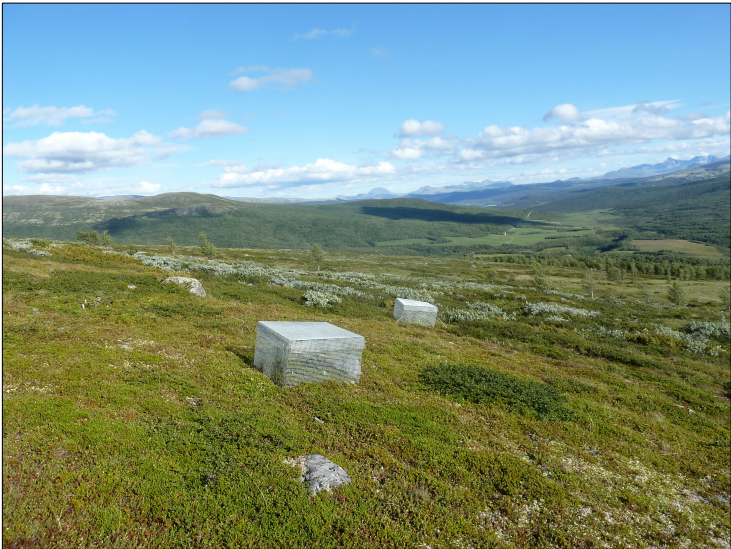

B

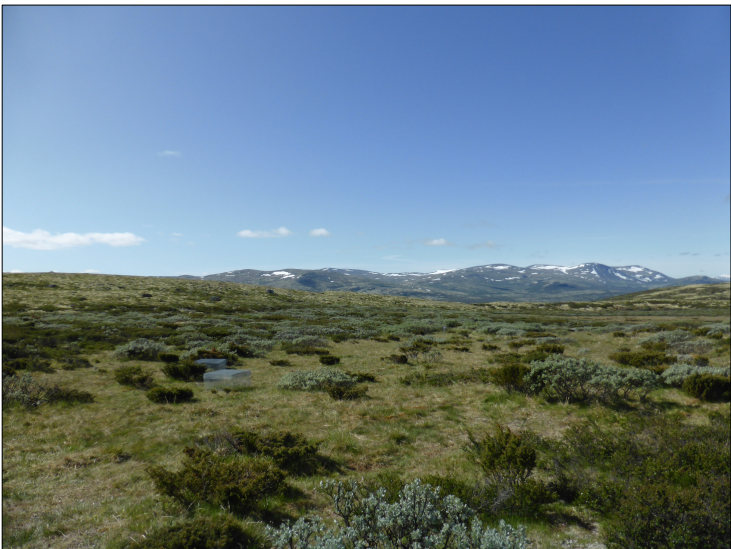

C

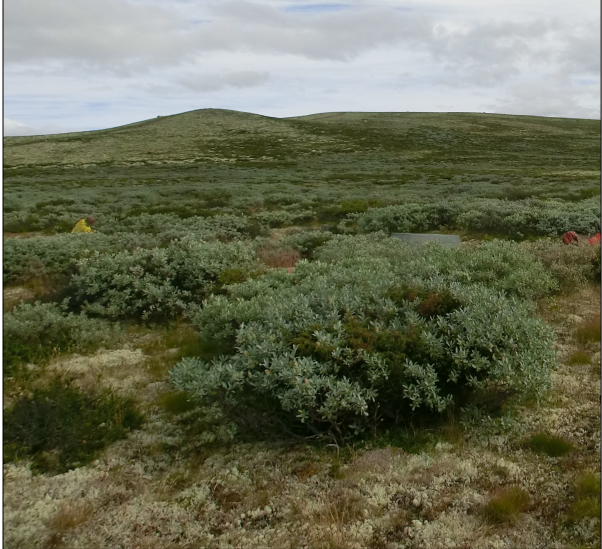

D

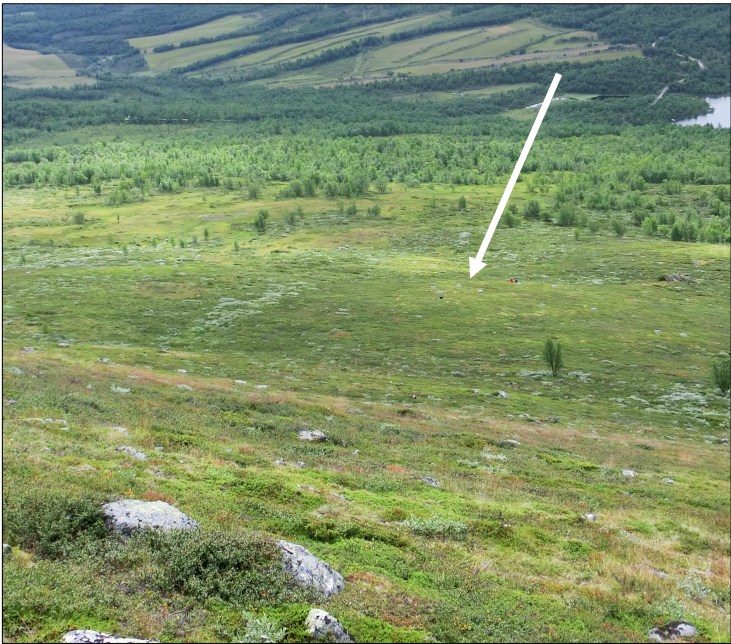

E

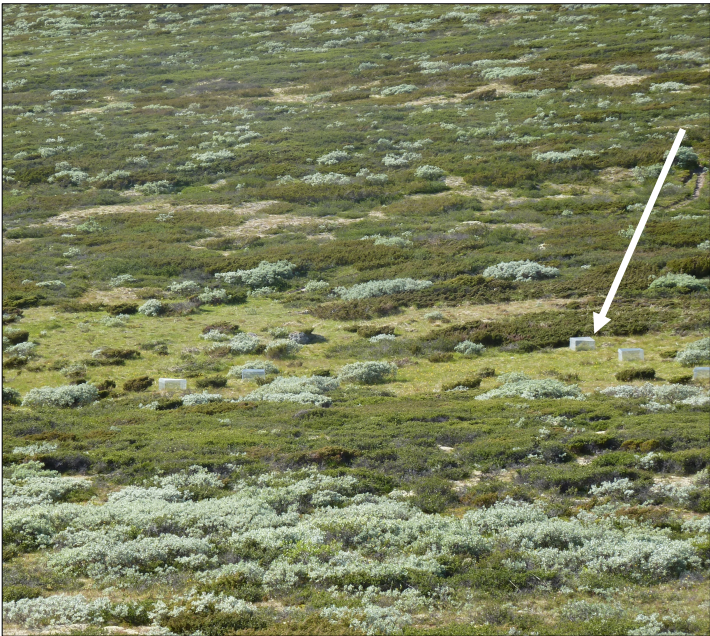

F

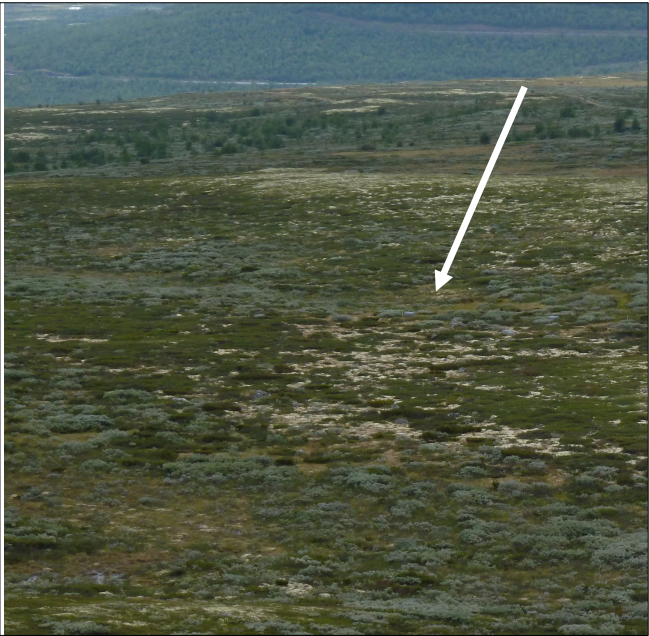

Supplement: Supplementary file 4 [file 1]
